1 **Drosophila embryonic type II neuroblasts: origin, temporal patterning, and contribution to**  
2 **the adult central complex**

3

4 Kathleen T. Walsh and Chris Q. Doe\*

5

6 Howard Hughes Medical Institute, Institute of Molecular Biology, and Institute of Neuroscience,  
7 University of Oregon, Eugene 97403

8

9 \*Corresponding author: [cdoe@uoregon.edu](mailto:cdoe@uoregon.edu)

10

11 Doe ORCID 0000-0001-5980-8029

12 Walsh ORCID 0000-0001-8304-5068

13

14

15 **ABSTRACT**

16

17 *Drosophila* neuroblasts are an excellent model for investigating how neuronal diversity is  
18 generated. Most brain neuroblasts generate a series of ganglion mother cells (GMCs) that each  
19 make two neurons (type I lineage), but sixteen brain neuroblasts generate a series of intermediate  
20 neural progenitors (INPs) that each produce 4-6 GMCs and 8-12 neurons (type II lineage). Thus,  
21 type II lineages are similar to primate cortical lineages, and may serve as models for  
22 understanding cortical expansion. Yet the origin of type II neuroblasts remains mysterious: do  
23 they form in the embryo or larva? If they form in the embryo, do their progeny populate the adult  
24 central complex, as do the larval type II neuroblast progeny? Here we present molecular and  
25 clonal data showing that all type II neuroblasts form in the embryo, produce INPs, and express  
26 known temporal transcription factors. Embryonic type II neuroblasts and INPs undergo  
27 quiescence, and produce embryonic-born progeny that contribute to the adult central complex.  
28 Our results provide a foundation for investigating the development of the central complex, and  
29 tools for characterizing early-born neurons in central complex function.

30

31

32 **KEY WORDS:** neurogenesis, type II neuroblast, intermediate neural progenitors, INPs, temporal  
33 patterning, Pdm, Castor, Grainy head, Dichaete, central complex

## 34 INTRODUCTION

35

36 *Drosophila* neural progenitors, called neuroblasts, are a model system for investigating stem cell  
37 self-renewal versus differentiation (Doe, 2008; Reichert, 2011), as well as how a single  
38 progenitor generates different types of neurons and glia over time (Alsio et al., 2013; Kohwi et  
39 al., 2013). *Drosophila* type I neuroblasts have a relatively simple cell lineage: they undergo a  
40 series of asymmetric cell divisions to produce a series of smaller ganglion mother cells (GMCs)  
41 that typically differentiate into a pair of neurons. There are about 100 type I neuroblasts in each  
42 larval brain lobe; they generate progeny during embryogenesis, undergo a period of quiescence,  
43 and then resume their lineage in the larva (Truman and Bate, 1988; Datta, 1995; Maurange and  
44 Gould, 2005; Sousa-Nunes et al., 2010). Type I neuroblasts have a molecular profile that is  
45 Deadpan (Dpn)<sup>+</sup>, Asense (Ase)<sup>+</sup> and Pointed P1 (PntP1)<sup>-</sup> (Zhu et al., 2011; Xie et al., 2016).  
46 Moreover, many embryonic type I neuroblasts can transition to a simpler “type 0” lineage, in  
47 which each neuroblast daughter cell directly differentiates into a neuron (Karcavich and Doe,  
48 2005; Baumgardt et al., 2014; Bertet et al., 2014). In contrast, *Drosophila* type II neuroblasts have  
49 a more elaborate cell lineage: they divide asymmetrically to bud off smaller intermediate neural  
50 progenitors (INPs) that themselves produce a series of 4-6 GMCs that each make a pair of  
51 neurons or glia (Bello et al., 2008; Boone and Doe, 2008; Bowman et al., 2008; Izergina et al.,  
52 2009). Type II neuroblasts have a molecular profile that is Dpn<sup>+</sup>Ase<sup>-</sup> PntP1<sup>+</sup> (Bello et al., 2008;  
53 Boone and Doe, 2008; Bowman et al., 2008; Izergina et al., 2009; Zhu et al., 2011). Although  
54 there are only eight type II neuroblasts per larval brain lobe, they generate a major portion of the  
55 intrinsic neurons of the adult central complex (Bayraktar et al., 2010; Ito et al., 2013; Riebli et al.,  
56 2013; Yu et al., 2013), a neuropil devoted to multimodal sensory processing and locomotion  
57 (Martin et al., 1999; Renn et al., 1999; Strauss, 2002; Wessnitzer and Webb, 2006; Poeck et al.,  
58 2008; Wang et al., 2008; Pan et al., 2009; Bender et al., 2010; Boyan and Reichert, 2011; Ofstad  
59 et al., 2011; Seelig and Jayaraman, 2011; Seelig and Jayaraman, 2013; Seelig and Jayaraman,  
60 2015).

61 A large amount of work over the past two decades has illuminated the general principles  
62 for how type I neuroblasts generate neuronal diversity. First, dorso-ventral, anterior-posterior, and  
63 Hox spatial patterning cues generate unique neuroblast identities (Chu-LaGriff and Doe, 1993;  
64 Prokop and Technau, 1994; Skeath et al., 1995; McDonald et al., 1998; Weiss et al., 1998; Skeath  
65 and Thor, 2003; Marin et al., 2012; Estacio-Gomez and Diaz-Benjumea, 2014; Moris-Sanz et al.,  
66 2015). Second, the temporal transcription factors Hunchback (Hb), Krüppel (Kr), Nubbin/Pdm2  
67 (Pdm), Castor (Cas) and Grainy head (Grh) specify unique GMC identities within each neuroblast

68 lineage (Brody and Odenwald, 2000; Berger et al., 2001; Isshiki et al., 2001; Novotny et al.,  
69 2002; Cenci and Gould, 2005; Kanai et al., 2005; Grosskortenhaus et al., 2006; Mettler et al.,  
70 2006; Urban and Mettler, 2006; Maurange et al., 2008; Tran and Doe, 2008; Tsuji et al., 2008;  
71 Ulvklo et al., 2012; Herrero et al., 2014; Moris-Sanz et al., 2014). In contrast, much less is known  
72 about type II neuroblasts. Only one of the eight type II neuroblasts has been identified in the  
73 embryo (Hwang and Rulifson, 2011); the origin of the other type II neuroblasts has not been  
74 reported in existing embryonic brain neuroblast maps (Urbach and Technau, 2003). It remains  
75 unknown whether type II neuroblasts arise de novo from the neuroectoderm similar to type I  
76 neuroblasts, or whether they arise from a type I > type II transition similar to the type I > type 0  
77 neuroblast transitions (Baumgardt et al., 2014; Bertet et al., 2014). If type II neuroblasts form  
78 during embryogenesis, it is unknown whether they utilize the same Hb > Kr > Pdm > Cas > Grh  
79 temporal transcription factor cascade to generate neuronal diversity, or whether they make  
80 embryonic born INPs that sequentially express Dichaete (D) > Grh > Eyeless similar to larval  
81 INPs (Bayraktar and Doe, 2013). Furthermore, if type II neuroblast lineages are initiated in the  
82 embryo, it would be interesting to know if their INPs undergo quiescence, similar to type I and II  
83 neuroblasts; if so they would be the only cell type beyond neuroblasts known to enter quiescence  
84 at the embryo/larval transition. Perhaps most importantly, identifying embryonic type II  
85 neuroblasts is essential for subsequent characterization of their early-born progeny, which are  
86 likely to generate pioneer neurons crucially important for establishing larval or adult brain  
87 architecture.

88 Here we address all of these open questions. We show that all eight type II neuroblasts  
89 form during embryogenesis. We use molecular markers and clonal data to show that embryonic  
90 type II neuroblasts give rise to INPs that produce multiple GMCs and neurons during  
91 embryogenesis, and that INPs undergo quiescence during the embryo-larval transition. We find  
92 that embryonic type II neuroblasts sequentially express a subset of neuroblast temporal  
93 transcription factors (Pdm > Cas > Grh), and embryonic INPs express a subset of the known  
94 larval INP temporal transcription factors (Dichaete). Finally, we show that embryonic INPs give  
95 rise to neurons that survive to populate the adult central complex.

## 96 **RESULTS**

97

### 98 **All type II neuroblasts arise during embryogenesis**

99 Larval type II neuroblasts are PntP1<sup>+</sup> Dpn<sup>+</sup> Ase<sup>-</sup> and here we used these markers to determine if  
100 type II neuroblasts exist in the embryo. We found that type II neuroblasts formed internal to the

101 dorsal cephalic neuroectoderm beginning at late stage 11. At this stage, there is one  $PntP1^+ Dpn^+$   
102  $Ase^-$  type II neuroblast in a stereotyped dorsal posteromedial location; this is always the first type  
103 II neuroblast to appear (Fig. 1). By stage 12, the number of type II neuroblasts along the dorso-  
104 medial region of the brain increased from four (8h) to six (9.5h), and from stage 15 (12h) to the  
105 end of embryogenesis there were reliably eight type II neuroblasts per lobe (Fig. 1), the same  
106 number previously observed at all stages of larval development (Bello et al., 2008; Boone and  
107 Doe, 2008; Bowman et al., 2008; Izergina et al., 2009). We reliably found three clusters of type II  
108 neuroblasts: an anteromedial group of three neuroblasts, a medial group of three neuroblasts, and  
109 a posterior ventrolateral group of two neuroblasts (Fig. 1A; summarized in Fig. 1B). Due to the  
110 dynamic morphogenetic movements of head involution, and the close positioning of the type II  
111 neuroblasts, we could not reliably identify individual neuroblasts within each cluster.

112 We tried to link the embryonic type II neuroblasts to the map of embryonic brain  
113 neuroblasts (Urbach and Technau, 2003), but were unsuccessful, probably because most type II  
114 neuroblasts arise later than the stages described in that study. Based on molecular marker  
115 analysis, we conclude that all eight known type II neuroblasts form during embryogenesis and  
116 they are among the last neuroblasts to form during embryogenesis.

117

### 118 **Embryonic type II neuroblasts generate INPs, GMCs, and neurons during embryogenesis**

119 Here we use molecular markers and clonal analysis to determine whether embryonic type II  
120 lineages produce INPs, GMCs, and neurons. We used a *Pnt-gal4* line to make clones; to validate  
121 the type II lineage-specific expression of this line, we stained for *Pnt-gal4* and type II neuroblast  
122 and INP markers (Fig. 2A). We found that *Pnt-gal4* is expressed in the parental type II neuroblast,  
123 the maturing INPs, and their GMC progeny (Fig. 2B). We did not detect any type I neuroblasts  
124 expressing this marker. Next, we generated “flip-out” clones using the heat shock-inducible  
125 multicolor flip out method (Nern et al., 2015) crossed to the *Pnt-gal4* line. When we assayed  
126 clones relatively early in embryogenesis (stage 13) we detected small clones containing a single  
127 type II neuroblast and one or more INPs (Fig. 2C; Table 1). Allowing the embryos to develop  
128 further resulted in larger clones that additionally contained GMCs and neurons (Fig. 2D). We  
129 found clones containing one type II neuroblast with up to five INPs at the latest stages of  
130 embryogenesis (Table 1). Taken together, these data show that embryonic type II neuroblasts  
131 generate multiple INPs which themselves produce GMCs and neurons prior to larval hatching.

132 A defining feature of type II neuroblasts is their ability to make INPs which undergo a  
133 molecularly asymmetric cell division to self-renew and generate a GMC (Bello et al., 2008;  
134 Boone and Doe, 2008; Bowman et al., 2008; Izergina et al., 2009). Here we determine if



135 embryonic INPs undergo asymmetric cell division. To identify INPs and their progeny, we used  
136 the INP marker *R9D11-tdTomato* (henceforth *9D11-tom*) (Bayraktar and Doe, 2013), and  
137 confirmed that it is expressed in embryonic INPs (Figs 3A,B). We also detected a deep ventral  
138 cluster of unrelated cells that expressed *9D11-tom* but not Dpn, but these can be excluded from  
139 analysis due to their distinct position (Fig. 3A, asterisk). Using this marker, we found that *9D11-*  
140 *tom*<sup>+</sup> Dpn<sup>+</sup> embryonic INPs undergo asymmetric cell division: they partition aPKC and Miranda  
141 to opposite cortical domains (Fig. 3C). To confirm that these GMCs generate post-mitotic  
142 neurons during embryogenesis, we stained for the neuronal marker Elav, and found that *9D11-*  
143 *tom* clusters contained Elav<sup>+</sup> neurons (Fig. 3D). Additionally, axon fascicles from single type II  
144 neuroblast lineage clones were visible during embryogenesis (data not shown), confirming the  
145 production of embryonic-born neurons from type II lineages. We conclude that embryonic type II  
146 neuroblasts generate asymmetrically dividing INPs that produce GMCs and neurons during  
147 embryogenesis.

148

#### 149 **Embryonic type II neuroblasts and INPs undergo quiescence**

150 Type I central brain and thoracic neuroblast have been shown to undergo quiescence at the  
151 embryo-larval transition (Truman and Bate, 1988). Type II neuroblasts also undergo quiescence,  
152 because only the four mushroom body neuroblasts and a single lateral neuroblast maintain  
153 proliferation during the embryo-larval transition (Egger et al., 2008). In contrast, nothing is  
154 known about whether INPs undergo quiescence. To address this question, we counted the total  
155 number of INPs over time, as well as the number of mitotic INPs. We identified INPs as *9D11-*  
156 *tom*<sup>+</sup> Dpn<sup>+</sup> and mitotic INPs by immunoreactivity for phospho-histone H3 (pH3). We quantified  
157 INPs in each cluster independently as well as all INPs in each brain lobe (Fig. 4A). We observed  
158 a fairly constant number of INPs in each cluster from embryonic stage 14 to stage 17 (Fig. 4B),  
159 yet the number of proliferating INPs declined significantly over time, reaching zero by stage 17  
160 (Fig. 4C). We conclude that the INPs enter quiescence by embryonic stage 17.

161 If INPs enter quiescence in the late embryo, we should be able to detect them in the  
162 newly hatched larvae, prior to production of larval born INPs made from type II neuroblasts that  
163 have re-entered the cell cycle. We assayed 0-4h newly-hatched larvae for Dpn and *9D11-tom* to  
164 mark the small quiescent INPs (Fig. 4D). We observed an average of  $10 \pm 2$  *9D11-tom*<sup>+</sup> Dpn<sup>+</sup>  
165 cells in each brain lobe, and none of these INPs were mitotic (n=11; Fig. 4D). We conclude that  
166 INPs undergo quiescence in the late embryo and can persist into the larvae. The fate of these  
167 quiescent INPs – whether they resume proliferation, differentiate, or die – remains to be  
168 determined.

169

170 **Embryonic type II neuroblasts undergo a late temporal transcription factor cascade**

171 Embryonic type I neuroblasts undergo a well-characterized temporal transcription factor cascade  
172 that generates GMC diversity and ultimately neuronal diversity. Most type I neuroblasts  
173 sequentially express Hunchback > Krüppel > Pdm > Cas > Grh (Kohwi and Doe, 2013), although  
174 late-forming neuroblasts can skip some of the early factors: neuroblast 3-3 begins the series with  
175 Krüppel (Tsuji et al., 2008) and NB6-1 begins the series with Cas (Cui and Doe, 1992). Due to  
176 the fact that type II neuroblasts are among the latest to form, it raises the possibility that they do  
177 not express any known temporal transcription factors.

178 We stained embryos for type II neuroblast markers ( $Dpn^+ Ase^-$ ) and individual temporal  
179 identity transcription factors. We did not observe the first two temporal transcription factors,  
180 Hunchback or Krüppel, in any type II neuroblasts at any stage of development (data not shown).  
181 We next focused on the first type II neuroblast to form, which can be uniquely identified at late  
182 stage 11 (see Fig. 1). This early-forming neuroblast showed the temporal cascade of Pdm >  
183 Pdm/Cas > Cas > Cas/Grh > Grh (Fig. 5). All later-forming type II neuroblasts exhibited a more  
184 truncated temporal cascade of Cas > Cas/Grh > Grh (Fig. 5). We conclude that embryonic type II  
185 neuroblasts undergo a late temporal transcription factor cascade.

186

187 **Embryonic INPs undergo a truncated temporal transcription factor cascade.**

188 Larval INPs undergo a temporal transcription factor cascade of Dichaete-Grh-Eyeless over their  
189 ~12 hour lifespan (Bayraktar and Doe, 2013). We wondered if the shorter timeframe of  
190 embryogenesis may result in shorter temporal transcription factor expression windows, a  
191 truncated temporal cascade, or perhaps a lack of all temporal transcription factor expression.

192 To identify embryonic INPs expressing known INP temporal transcription factors, we  
193 generated FLP-out clones using a heat shock FLP in mid-embryogenesis (4h-9h) and assayed  
194 brains containing a single type II neuroblast clone. We stained embryos for the clone marker,  
195 Dpn, and Ase to identify the neuroblast ( $Dpn^+ Ase^-$ ) and INPs ( $Dpn^+ Ase^+$ ), and one of the larval  
196 INP temporal transcription factors (Dichaete, Grh or Eyeless). We found that the early temporal  
197 factor Dichaete was detected in all INPs within the anterior and middle clusters (n=15 clones,  
198 anterior; n=12 clones, middle) (Fig. 6A,B; quantified in Table 2), but the posterior cluster  
199 contained no Dichaete<sup>+</sup> INPs at any stage (n=9 clones) (Fig. 6C; quantified in Table 2). The  
200 middle temporal factor, Grh, was only detected in a single INP next to Grh<sup>+</sup> neuroblasts, but not  
201 next to Grh<sup>-</sup> neuroblasts, suggesting that it is transiently inherited from the parental neuroblast, as  
202 is also observed in larval INP lineages (Bayraktar and Doe, 2013); we never detected Grh in INPs

203 distant from the neuroblasts, as would be expected for a middle temporal transcription factor  
204 (data not shown). The late temporal factor Eyeless was never detected in INPs during  
205 embryogenesis (data not shown). We conclude that embryonic INPs undergo a temporal cascade  
206 that is truncated during the Dichaete window by entry into quiescence (Fig. 6E). It would be  
207 interesting to determine whether embryonic-born INPs express the later temporal factors Grh and  
208 Eyeless in the larvae, if they re-enter the cell cycle.

209

### 210 **Embryonic-born INPs contribute to the adult central complex.**

211 Embryonic type II neuroblasts produce neurons with contralateral projections, where they have  
212 been proposed to pioneer the fan shaped body neuropil of the central complex (Riebli et al.,  
213 2013). To determine if embryonic-born INP progeny persist into adulthood we used the FLEX-  
214 AMP system (Bertet et al., 2014) to permanently mark embryonic INPs and their progeny and  
215 trace them into the adult brain. FLEX-AMP uses a brief inactivation of temperature-sensitive  
216 Gal80 protein (by shifting to 29°C) to allow transient expression of Gal4, which induces FLP  
217 expression and the permanent expression of *actin-LexA LexAop-myr:GFP* (Fig. 7A). We crossed  
218 *R9D11-gal4* (expressed in embryonic INPs) to the FLEX-AMP stock and raised the flies at 18°C  
219 (negative control), 29°C (positive control), or with a 10 hour pulse of 29°C at late embryogenesis  
220 followed by 18°C for the rest of the fly's life ("immortalization of embryonic progeny"  
221 experiment).

222 We found robust labeling of >500 neurons in the positive control brains raised at 29°C,  
223 including many cell bodies innervating the protocerebral bridge, fan shaped body, ellipsoid body  
224 and noduli (Fig. 7B-H). The negative control (18°C permanently) showed labeling of just ~10  
225 neurons that project to the dorsal part of the fan shaped body (Fig. 7G- K), which is similar to the  
226 adult pattern of R9D11 (FlyLight). We suspect the "leaky" expression at 18 °C may reflect the  
227 inefficiency of Gal80 repression in these adult neurons. Importantly, FLEX-AMP immortalization  
228 of embryonic INP progeny showed labeling of additional neurons ( $64 \pm 4$ ) that project to three  
229 central complex regions: the protocerebral bridge, a large portion of the fan shaped body and the  
230 ellipsoid body, but notably not the noduli (Fig. 7 L-P). Within the ellipsoid body, we observed  
231 variation in labeling. Most brains contained one to two wedge neurons (arrows in Fig. 7P') and  
232 widefield neuron innervation throughout the posterior region of the ellipsoid body (Fig. 7P'', n=  
233 12). Interestingly, a few brains contained only the wedge neurons suggesting the widefield neuron  
234 innervation may be an early-born neuron within the lineages (See Discussion) (n= 3/12, Fig. 7 Q,  
235 R). Additionally, FLEX-AMP immortalization of embryonic INP progeny identified neurons  
236 innervating the central complex accessory neuropils lateral accessory lobe (LAL) and the Gall,

237 which were never labeled in the 18°C negative control (Fig. S1). We conclude that embryonic  
238 INPs generate progeny that persist into the adult brain, and innervate three neuropils of the central  
239 complex.

240

## 241 **DISCUSSION**

242 It has been difficult to link embryonic neuroblasts to their larval counterparts in the brain and  
243 thoracic segments due to the period of quiescence at the embryo-larval transition, and due to  
244 dramatic morphological changes of the CNS that occur at late embryogenesis. Recent work has  
245 revealed the embryonic origin of some larval neuroblasts: the four mushroom body neuroblasts in  
246 the central brain and about twenty neuroblasts in thoracic segments (Kunz et al., 2012; Lacin and  
247 Truman, 2016). Here we use molecular markers and clonal analysis to identify all eight known  
248 type II neuroblasts in each brain lobe and show they all form during embryogenesis, perhaps the  
249 last-born central brain neuroblasts. We were unable to individually identify each neuroblast,  
250 however, due to their tight clustering, movements of the brain lobes, and lack of markers for  
251 specific type II neuroblasts.

252 The single previously reported embryonic type II neuroblast formed from PntP1<sup>+</sup>  
253 neuroectodermal cells with apical constrictions called a placode (Hwang and Rulifson, 2011). We  
254 have not investigated this neuroectodermal origin of type II neuroblasts in much detail, but we  
255 also observe multiple type II neuroblasts developing from PntP1<sup>+</sup> neuroectoderm (data not  
256 shown). In the future, it would be interesting to determine whether all type II neuroblasts arise  
257 from PntP1<sup>+</sup> neuroectoderm or from neuroectodermal placodes. Interestingly, one distinguishing  
258 molecular attribute of type II neuroblasts is PntP1, which is not detected in type I neuroblasts  
259 (Zhu et al., 2011; Xie et al., 2016). Thus, a candidate for distinguishing type I / type II neuroblast  
260 identity is EGF signaling, which can be detected in the three head placodes (de Velasco et al.,  
261 2007; Hwang and Rulifson, 2011) and is required for PntP1 expression (Gabay et al., 1996).  
262 Clearly there are more PntP1<sup>+</sup> neuroectodermal cells than there are type II neuroblasts, however,  
263 which may require expression of an EGF negative regulator such as Argos (Rebay, 2002) to  
264 divert some of these neuroectodermal cells away from type II neuroblast specification. The  
265 earliest steps of type II neuroblast formation represent an interesting spatial patterning question  
266 for future studies.

267 Now that we have identified the embryonic type II neuroblasts, it is worth considering  
268 whether there are differences between embryonic and larval type II neuroblasts or their INP  
269 progeny. To date, molecular markers do not reveal any differences between embryonic and larval  
270 type II neuroblasts, with the exception that embryonic neuroblasts transiently express the

271 temporal transcription factor Pdm (see below). Are there differences between embryonic and  
272 larval INPs? Larval INPs mature over a period of six hours and then divide four to six times with  
273 a cell cycle of about one hour (Bello et al., 2008). In contrast, embryonic INPs may have a more  
274 rapid maturation because we see  $Elav^+$  neurons within  $9D11^+$  INP lineages by stage 14, just 3  
275 hours after the first type II neuroblast forms. We found that INPs undergo quiescence at the  
276 embryo-larval transition, as shown by the pools of INPs at stage 16 that do not stain for the  
277 mitotic marker pH3. The fate of these quiescent INPs – whether they resume proliferation,  
278 differentiate, or die – remains to be determined.

279 Neuroblasts in the embryonic VNC use the temporal transcription factor cascade  
280 Hunchback (Hb) > Krüppel > Pdm > Cas > Grh to generate neural diversity (Brody and Odenwald,  
281 2002; Kohwi et al., 2013; Allan and Thor, 2015; Kang and Reichert, 2015; Doe, 2017). Here we  
282 show that the type II neuroblasts are among the last neuroblasts to form in the embryonic brain,  
283 and that they sequentially express only the late temporal transcription factors Pdm (in the earliest-  
284 forming neuroblast) followed by Cas and Grh (in all eight type II neuroblasts). It is unknown why  
285 most type II neuroblasts skip the early Hb > Kr > Pdm temporal transcription factors; perhaps it is  
286 due to their late time of formation, although several earlier-forming thoracic neuroblasts also skip  
287 Hb (NB3-3), Hb > Kr (NB5-5), or Hb > Kr > Pdm (NB6-1) (Cui and Doe, 1992; Tsuji et al., 2008;  
288 Benito-Sipos et al., 2010). This is another interesting spatial patterning question for the future.

289 Type I neuroblasts show persistent expression of the temporal transcription factors within  
290 neurons born during each window of expression (i.e. a  $Hb^+$  neuroblast divides to produce a  $Hb^+$   
291 GMC which makes  $Hb^+$  neurons). In contrast, we find that type II neuroblasts do not show  
292 persistent Cas or Grh expression in INPs born during each expression window (data not shown).  
293 Both transcription factors can be seen in INPs immediately adjacent to the parental neuroblast,  
294 but not those more distant (data not shown). This shows that Cas and Grh are down regulated in  
295 INPs rather than maintained in the INP throughout its lineage and into all its post-mitotic neural  
296 progeny. The function of Pdm, Cas and Grh in embryonic type II neuroblasts awaits identification  
297 of specific markers for neural progeny born during each expression window.

298 During larval neurogenesis, virtually all INPs sequentially express the temporal  
299 transcription factors Dichaete > Grh > Eyeless (Bayraktar and Doe, 2013). In contrast, embryonic  
300 INPs express only Dichaete. These data, together with the short time frame of embryogenesis,  
301 suggests that INP quiescence occurs during the Dichaete window, preventing expression of the  
302 later Grh > Ey cascade. Interestingly, INPs in the posterior cluster completely lack Dichaete,  
303 suggesting they may be using a different temporal transcription factor cascade. The posterior  
304 cluster type II neuroblasts are likely to be the DL1-DL2 type II neuroblasts, which have never

305 been assayed for the *Dichaete* > *Grh* > *Eyeless* cascade in larval stages. Perhaps these two  
306 neuroblasts use a novel temporal cascade in both embryonic and larval stages.

307 Larval type II neuroblasts produce many intrinsic neurons of the adult central complex  
308 (Bayraktar and Doe, 2013; Ito et al., 2013; Yu et al., 2013). Here we show that embryonic INPs  
309 also produce neurons that contribute to the adult central complex. Our data show ~54 neurons (64  
310 minus the 10 due to "leaky" expression) born from embryonic-born INPs survive to adulthood  
311 and innervate the central complex. It is likely that this is an underestimate, however, because (1)  
312 *9D11-gal4* expression is lacking from a few INPs in the embryonic brain and (2) the time to  
313 achieve sufficient FLP protein levels to achieve immortalization may miss the earliest born  
314 neurons. The variation in immortalization of the wide field ellipsoid body neuron may represent a  
315 neuron born early in the type II lineages, thus unlabeled in a subset of embryos. Additionally,  
316 some embryonic born neurons may perform important functions in the larval/pupal stages but die  
317 prior to eclosion.

318 Further studies will be required to understand the function of neurons born from  
319 embryonic type II lineages. It remains to be experimentally determined whether some or all  
320 embryonic progeny of type II neuroblasts (a) remain functionally immature in both the larval and  
321 adult brain, but serve as pioneer neurons to guide larval-born neurons to establish the central  
322 complex, (b) remain functionally immature in the larval brain, but differentiate and function in  
323 the adult central complex, or (c) differentiate and perform a function in both the larval and adult  
324 CNS. It will be informative to selectively ablate embryonic-born neurons and determine the effect  
325 on the assembly of the larval or adult central complex, and their role in generating larval and  
326 adult behavior.  
327



## 328 MATERIALS AND METHODS

### 329 *Fly stocks*

330 The chromosomes and insertion sites of transgenes (if known) are shown next to genotypes.  
331 Unless indicated, lines were obtained from Bloomington stock center (FlyBase IDs shown).  
332 Enhancer gal4 lines and reporters: *P[GAL4]pnt<sup>14-94</sup>* (III) (gift of Jan Lab), *R9D11-gal4* (III,  
333 *attP2*), *R9D11-CD4-tdTomato* (III, *attP2*), *10XUAS-IVS-mCD8::GFP* (III, *su(Hw)attP2*)  
334 (referred to as *UAS-GFP*). *hs FLPG5*;MCFO (I and III; FBst0064086). For FLEXAMP  
335 experiment, *y,w,UAS-FLP*; *tubGAL80ts/CyO*; *R9D11-gal4/TM3* and *13Xlex- Aop2-myr::GFP* ;  
336 *tubGAL80ts/CyO* ; *P{nSyb(FRT.stop)LexA.p65}*.

337

### 338 *Immunofluorescent staining*

339 Primary antibodies were rat anti-Dpn (1:50, Abcam; Eugene, OR, USA), guinea pig anti-Dpn  
340 (1:1000, Jim Skeath; Washington Univ.), chicken anti-GFP (1:1000, Aves Laboratories, Tigard,  
341 OR), guinea pig anti-D (1:500, John Nambu; Univ. Massachusetts, Amherst), rabbit anti-Ey  
342 (1:2500, Uwe Walldorf; Germany), rabbit anti-phospho-Histone H3 (ser 10) (1:20,000, Millipore,  
343 Temecula, CA), rabbit anti-PntP1 (1:1000, Jim Skeath; Washington Univ.), rat anti-Grh (1:1000,  
344 Stefan Thor), rabbit anti-DsRed (1:1000, Clontech Laboratories, Mountain View, CA, USA),  
345 rabbit anti-Ase (1:1000, Cheng-Yu Lee; Univ. Michigan), mouse anti-Hunchback (1:500; Abcam;  
346 Eugene, OR, USA), guinea pig anti Krüppel (1:500, Doe Lab), rat anti-Pdm2 (1:1000 Abcam;  
347 Eugene, OR, USA), guinea pig anti-Asense (1:1000; Hongyan Wang, NUS/Duke, Singapore),  
348 rabbit anti-Cas (1:1000, Ward Odenwald, distributed by the Doe lab), mouse anti-NC82 (1:200,  
349 Developmental Studies Hybridoma Bank). Secondary antibodies were from Molecular Probes  
350 (Eugene, OR, USA) or Jackson Immunoresearch (West Grove, PA, USA) used at 1:400.

351 Embryos were blocked overnight in 0.3% PBST (1X phosphate buffered saline with 0.3%  
352 Triton X-100) with 5% normal goat serum and 5% donkey serum (PDGS) (Vector Laboratories,  
353 Burlingame, CA, USA), followed by incubation in primary antibody overnight at 4°C. Next,  
354 embryos underwent four washes 15 minutes each in PDGS, followed by a 2 hour secondary  
355 antibody incubation at 25°C. After secondary, embryos were either dehydrated with ethanol and  
356 mounted in dibutyl phthalate in xylene (DPX) according to Janelia protocol (Wolff et al., 2015)  
357 or were cleared with a glycerol series: 25% for 10 minutes, 50% for ten minutes, 90% for ten  
358 minutes then into 90% glycerol with 4% n-propyl gallate overnight before imaging.

359 Larval brains were dissected in PBS, fixed in 4% formaldehyde in PBST for 25 min,  
360 rinsed 30 minutes PBST, and blocked in PDGS overnight at 4°C. Staining as above for embryos,  
361 but after secondary were mounted in Vectashield (Vector Laboratories, Burlingame, CA, USA).



362 Adult brains were fixed in 2% formaldehyde in PBST, rinsed, and blocked in PDGS with  
363 0.5% Triton. Brains were incubated in primary antibodies for four days at 4°C, then in secondary  
364 antibodies for two days at 4°C. Brains were mounted in DPX according to Janelia protocol.

365

### 366 ***Clones***

367 For type II clones, *P[GAL4]pnt<sup>14-94</sup>* (III) x *hs FLP5;;MCFO* (I and III; FBst0064086) embryos  
368 were collected for four hours at 25°C, aged four hours and heat shocked at 37°C for 12 minutes,  
369 then left to develop until desired stages.

370

### 371 ***FLEX-AMP immortalization of embryonic INPs***

372 The FLEXAMP experiment used 1- 3 day old adult females from crossing: *y,w,UAS-FLP;*  
373 *tubGAL80ts/CyO; R9D11-gal4/TM3* to *13Xlex- Aop2-myr::GFP ; tubGAL80ts/CyO ;*  
374 *P{nSyb(FRT.stop)LexA.p65}* to permanently label embryonic INPs (Bertet et al., 2014). Negative  
375 controls were raised continuously at 18°C to maintain Gal80 repression; positive controls were  
376 raised continuously at 29°C inactivate Gal80 and allow 9D11-gal4 expression. To "immortalize"  
377 embryonic INPs and their progeny, we exposed embryos aged 5-6 hours to 29°C for ten hours to a  
378 allow *R9D11-gal4* expression and then shifted all unhatched embryos to 18°C to block *R9D11-*  
379 *gal4* expression during larval, pupal and adult stages.

380

### 381 ***Cell proliferation analysis***

382 Number of proliferating INPs was calculated by dividing the number pH3 positive by the number  
383 of total INPs within each cluster of neuroblast at different stages. Each circle represents one  
384 cluster of INPs. Error bars represent standard error of the mean.

385

### 386 ***Imaging***

387 Images were captured with a ZeissLSM700 or ZeissLSM710 confocal microscope with a z-  
388 resolution of 1.0 micron, and processed in the open source software FIJI (<http://fiji.sc>) and  
389 Photoshop CS5 (Adobe, San Jose, CA, USA). Figures were made in Illustrator CS5 (Adobe, San  
390 Jose, CA, USA). Three-dimensional brain reconstructions in Figs. 3 and 6 were generated using  
391 Imaris (Bitplane, Zurich, Switzerland).

392

### 393 ***Acknowledgements***

394 We thank Luis Sullivan, Emily Sales, Laurina Manning, and Sen-Lin Lai for fly stocks, technical  
395 assistance and helpful discussions; Sen-Lin Lai and Volker Hartenstein for comments on the

396 manuscript; Jim Skeath, John Nambu, Uwe Walldorf, Stefan Thor, Cheng-Yu Lee, Claude  
397 Desplan, Hongyan Wang, and Ward Odenwald for reagents; and Fernando Diaz-Benjumea and  
398 Volker Hartenstein for sharing unpublished work. We acknowledge the Bloomington Drosophila  
399 Stock Center (NIH P40OD018537) and the Developmental Studies Hybridoma Bank (DSHB).

400

#### 401 **Author contributions**

402 KTW and CQD conceived the project; KTW performed all the experiments; KTW and CQD  
403 wrote the manuscript.

404

#### 405 **Funding**

406 This work was funded by NIH HD27056 (CQD), a Genetics Training Grant T32 GM007413  
407 (KW) and the Howard Hughes Medical Institute, where CQD is an Investigator.

408

409 **Competing interests:** none.

410

#### 411 **List of Symbols and Abbreviations:**

412 Ase (Asense)

413 Dpn (Deadpan)

414 D (Dichaete)

415 EB (ellipsoid body)

416 FB (fan shaped body)

417 GMC (ganglion mother cell)

418 Grh (Grainy head)

419 Hb (Hunchback)

420 INPs (intermediate neural progenitors)

421 Kr (Krüppel)

422 NO (noduli)

423 Pdm (Nubbin/Pdm2)

424 PntP1 (Pointed P1)

425 PB (protocerebral bridge)

426 R9D11-tdTomato (9D11-tom)

427

428

429 **Table 1. Type II neuroblast clones contain INPs, GMCs, and neurons.**

430 Each row represents a single clone that is clearly spatially separate from other clones in the  
431 embryonic brain. Stage, time of clone analysis. Markers, molecular marker profile of each cell in  
432 the clone.

433

| <b>Cluster</b> | <b>Stage</b> | <b>Type II<br/>NB<br/><i>Dpn+ Ase-</i></b> | <b>INP<br/><i>Dpn+Ase+</i></b> | <b>GMC<br/><i>Dpn-Ase+</i></b> | <b>Neuron<br/><i>Dpn- Ase-</i></b> | <b>Total<br/>Cells</b> |
|----------------|--------------|--------------------------------------------|--------------------------------|--------------------------------|------------------------------------|------------------------|
| Anterior       | 15           | 1                                          | 2                              | 0                              | 0                                  | 3                      |
| Anterior       | 15           | 1                                          | 2                              | 0                              | 0                                  | 3                      |
| Anterior       | 16           | 1                                          | 1                              | 3                              | 0                                  | 5                      |
| Anterior       | 16           | 1                                          | 1                              | 2                              | 5                                  | 9                      |
| Anterior       | 16           | 1                                          | 1                              | 1                              | 9                                  | 12                     |
| Anterior       | 16           | 1                                          | 1                              | 2                              | 5                                  | 9                      |
| Middle         | 15           | 1                                          | 1                              | 1                              | 0                                  | 3                      |
| Middle         | 15           | 1                                          | 1                              | 2                              | 0                                  | 4                      |
| Posterior      | 16           | 1                                          | 2                              | 1                              | 7                                  | 11                     |
| Posterior      | 14           | 1                                          | 6                              | 3                              | 2                                  | 12                     |
| Posterior      | 15           | 1                                          | 5                              | 3                              | 3                                  | 12                     |
| Posterior      | 15           | 1                                          | 4                              | 1                              | 7                                  | 13                     |
| Posterior      | 15           | 1                                          | 2                              | 4                              | 2                                  | 9                      |
| Posterior      | 15           | 1                                          | 1                              | 1                              | 0                                  | 3                      |

434

435

436

437 **Table 2. *Dichaete* is expressed in embryonic INPs.**

438 Each row represents a single neuroblast clone that is spatially separate from other clones in the  
439 embryonic brain. Stage, time of clone analysis.

440

| <b>Cluster</b> | <b>Stage</b> | <b>Type II NB</b><br><i>Dpn+ Ase-</i> | <b>INP</b><br><i>Dpn+Ase+</i> | <b>D+ INP</b><br><i>Dpn-Ase+ D+</i> |
|----------------|--------------|---------------------------------------|-------------------------------|-------------------------------------|
| Anterior       | 14           | 1                                     | 1                             | 1                                   |
| Anterior       | 15           | 1                                     | 2                             | 2                                   |
| Anterior       | 15           | 1                                     | 1                             | 1                                   |
| Anterior       | 15           | 1                                     | 2                             | 2                                   |
| Anterior       | 16           | 1                                     | 1                             | 1                                   |
| Anterior       | 16           | 1                                     | 2                             | 2                                   |
| Middle         | 15           | 1                                     | 1                             | 1                                   |
| Middle         | 15           | 1                                     | 1                             | 1                                   |
| Middle         | 15           | 1                                     | 2                             | 2                                   |
| Middle         | 16           | 1                                     | 2                             | 2                                   |
| Middle         | 16           | 1                                     | 2                             | 2                                   |
| Middle         | 16           | 1                                     | 1                             | 1                                   |
| Middle         | 16           | 1                                     | 1                             | 1                                   |

441

442 **Figure 1. Eight type II neuroblasts arise during embryogenesis.**

443 (A) Embryonic type II neuroblasts (yellow circles on left brain lobe; unlabeled on right brain  
444 lobe) are PntP1<sup>+</sup> (magenta) Dpn<sup>+</sup> (red) Ase<sup>-</sup> (cyan). Each stage shows multiple focal planes  
445 from anterior to posterior (top to bottom in the figure) to clearly visualize each type II neuroblast,  
446 except for stage 11 where there is a single type II neuroblast.

447 (B) Summary of type II neuroblast formation; due to rapid morphogenetic movements it is not  
448 possible to identify individual type II neuroblasts from stage to stage, but beginning at stage 14 it  
449 is possible to recognize three clusters of neuroblasts. All panels are dorsal views with the dorsal  
450 midline in the center of the panel, anterior up. Scale bar = 10  $\mu$ m.

451

452 **Figure 2. Clonal analysis shows that type II neuroblasts make INPs, GMCs and neurons**  
453 **during embryogenesis.**

454 (A) Molecular markers used to identify cell types within type II lineages, neuroblast (NB).

455 (B) Embryonic type II neuroblasts generate embryonic-born INPs and GMCs. Dorso-medial  
456 view of a type II neuroblast cluster in a stage 16 embryo. Type II neuroblast (Pnt-gal4<sup>+</sup> PntP1<sup>+</sup>  
457 Dpn<sup>+</sup> and Ase<sup>-</sup>; yellow circle); immature INP (Pnt-gal4<sup>+</sup> PntP1<sup>+</sup> Dpn<sup>-</sup> and Ase<sup>+</sup>; yellow  
458 arrowhead); mature INP (Pnt-gal4<sup>+</sup> PntP1<sup>+</sup> Dpn<sup>+</sup> and Ase<sup>+</sup>; white arrowhead); mature INP that  
459 has lost PntP1 expression (Pnt-gal4<sup>+</sup> PntP1<sup>-</sup> Dpn<sup>+</sup> and Ase<sup>+</sup>; white arrow); and GMC (Pnt-gal4<sup>+</sup>  
460 PntP1<sup>-</sup> Dpn<sup>-</sup> and Ase<sup>+</sup>; yellow arrow). Scale bar, 5  $\mu$ m.

461 (C) Single neuroblast clone assayed at stage 13; location shown in inset, lower left. Four cell  
462 clone containing a type II neuroblast and three INPs. Orientation is dorsal up, with the neuroblast  
463 closest to the dorsal surface of the brain.

464 (D) Single neuroblast clone assayed at stage 15; location shown in inset, lower left. Eleven cell  
465 clone containing a type II neuroblast, two INP, four GMCs, and four neurons. Orientation is  
466 dorsal up, showing that the neurons are sending projections ventrally (arrowhead). Scale bar for  
467 (C) and (D) = 10  $\mu$ m for clone projection, 5  $\mu$ m for insets.

468

469 **Figure 3. Embryonic INPs undergo asymmetric cell division**

470 (A,B) *R9D11-tdTomato* (*9D11-tom*) labels embryonic INPs and their progeny, but not type II  
471 neuroblasts. (A) Left: summary of type II neuroblast positions (dorsal view). Center and left  
472 panels: dorsal or lateral view of the three type II neuroblast clusters labeled with *Pnt-gal4* (green;  
473 type II neuroblasts and progeny) and *9D11-tom* (magenta; INPs and progeny). Note there is  
474 *9D11-tom* expression at a deep ventral location that is not near any type II lineage (asterisk).

475 Scale bar, 15  $\mu\text{m}$ . (B) Type II neuroblast (*Pnt-gal4*<sup>+</sup> *PntP1*<sup>+</sup> *Dpn*<sup>+</sup> *9D11-tom*<sup>+</sup> (yellow arrow); INP  
476 (*Pnt-gal4*<sup>+</sup> *PntP1*<sup>-</sup> *Dpn*<sup>+</sup> *9D11-tom*<sup>+</sup> (white arrowhead) at stage 16. Scale bar, 10  $\mu\text{m}$ .  
477 (C) Embryonic INPs undergo asymmetric cell division. INPs were identified as *9D11-tom*<sup>+</sup> *Dpn*<sup>+</sup>  
478 and positioned within the middle cluster of neuroblasts in the dorsal posterior medial brain lobe.  
479 aPKC and pH3 are co-stained: aPKC is localized to the larger apical cell cortex (white cortex  
480 above arrowheads; future INP daughter cell) while pH3 decorates the mitotic chromosomes in the  
481 middle of the INP. Miranda is localized to the smaller basal cell cortex (cyan cortex below  
482 arrowheads; future GMC daughter cell). Scale bar, 5  $\mu\text{m}$ .  
483 (D) Embryonic INPs generate embryonic-born neurons. Lateral view of a *9D11-tom*<sup>+</sup> cluster in a  
484 stage 16 embryo. The post-mitotic neuronal marker Elav is detected in a subset of the *9D11-tom*<sup>+</sup>  
485 cluster (white arrowheads), and axon projections can be observed (bottom left). Scale bar, 5  $\mu\text{m}$ .  
486

487 **Figure 4. INPs undergo quiescence across the embryo-larval transition.**

488 (A) Schematic outlining the three pools of type II neuroblast INP progeny assayed in graphs to  
489 the right (red box).  
490 (B) Total number of INPs per pool at the indicated stages; INPs identified as *9D11-tom*<sup>+</sup> *Dpn*<sup>+</sup>  
491 cells.  
492 (C) Number of phospho-histoneH3 (pH3)-positive mitotic INPs per pool at the indicated stages;  
493 INPs are identified as *9D11-tom*<sup>+</sup> *Dpn*<sup>+</sup> cells. Each circle represents the number of INPs in the  
494 cluster of neuroblasts shown in A; black bar represents the average, shown with SEM.  
495 (D) Quiescent INPs are present in the newly hatched larva. INPs marked with *9D11-gal4 UAS-*  
496 *tdTomato* (green); brain neuroblasts and INPs marked with *Dpn* (magenta). Anterior up, dorsal  
497 midline, dashed. Scale bar = 15  $\mu\text{m}$ .

498

499 **Figure 5. Embryonic type II neuroblasts express late temporal transcription factors.**

500 (A-F) Temporal transcription factor expression in the earliest type II neuroblast to form  
501 (posterior-most, see Fig. 1). Type II neuroblasts identified as *Dpn*<sup>+</sup> *Ase*<sup>-</sup> (left columns); temporal  
502 transcription factor expression reveals sequential expression of *Pdm*<sup>+</sup> > *Pdm*<sup>+</sup> *Cas*<sup>+</sup> > *Cas*<sup>+</sup> > *Cas*<sup>+</sup>  
503 *Grh*<sup>+</sup> > *Grh*<sup>+</sup>. Summarized at left; later-forming type II neuroblasts start the cascade with *Cas*.  
504 Scale bar = 10  $\mu\text{m}$ .

505

506 **Figure 6. Embryonic INPs express the Dichaete temporal transcription factor.**

507 (A) Anterior cluster clone containing Dichaete ( $D$ )<sup>+</sup> INPs. Four cell FLP-out clone at stage 16  
508 (left) stained for the clone marker (GFP, green), Dpn (magenta), Ase (cyan) and D (white). The  
509 clone contains a type II neuroblast (1), a  $D$ <sup>+</sup> INP (2) and two GMCs, one  $D$ <sup>+</sup> and one  $D$ <sup>-</sup> (3,4)  
510 (B) Anterior cluster clone containing  $D$ <sup>+</sup> INPs. Four cell FLP-out clone at stage 16 stained the  
511 same as in (A) containing a type II neuroblast (1), one  $D$ <sup>+</sup> INP (4), and two  $D$ <sup>-</sup> GMCs (2,3).  
512 (C) Posterior cluster clone lacking  $D$ <sup>+</sup> INPs. Nine cell FLP-out clone at stage 16 (left) stained the  
513 same as in (A) containing a type II neuroblast (1), four  $D$ <sup>-</sup> INPs (2,5-7) and four  $D$ <sup>-</sup> neurons  
514 (3,4,8,9). Scale bar 7  $\mu$ m in clonal projections, 5  $\mu$ m in insets.  
515 (D) Model for INP temporal factor expression; top, embryonic INPs from anterior and middle  
516 clusters; bottom, larval INP temporal factor expression (Bayraktar and Doe, 2013).  
517 (E) Cell type key for panels above.

518

519 **Figure 7. Embryonic INP progeny contribute to the adult central complex.**

520 (A) The FLEX AMP memory cassette used for immortalization of embryonic INPs into the adult  
521 brain; modified from Bertet et al. 2014.  
522 (B-P) Central complex neuropil regions from flies containing FLEX AMP memory cassette  
523 reared at different temperature regimes to permanently label neurons born within all development  
524 (29°C positive control), no stage of development (18°C negative control) or specifically during  
525 late embryogenesis (29°C pulse) stained for GFP (green) and NC82 (magenta).  
526 (B-F) Positive controls reared at 29°C from embryo to adult with over 500 ( $n=4$ ) of immortalized  
527 neurons innervating the PB, FB, EB and NO.  
528 (G-K) Negative control adult brains of flies reared at 18°C from embryo to adult showing  $10 \pm 5$   
529 ( $n=5$ ) neurons from the adult *9D11-gal4* pattern innervating only the dorsal region of the FB.  
530 (L-R) Experimental adult brains from flies reared for 6 hour pulse at 29°C at late embryonic  
531 stages, then reared at 18°C until adult (see methods); there are  $64 \pm 4$  ( $n=12$ ) neurons that  
532 innervate the PB, FB, EB but not the NO.  
533 (P'-R) Experimental adult brains with differences in innervation pattern within the EB ( $n=12$ ).  
534 (P') Single z plane from anterior region shown in (P) with innervation of two wedges within the  
535 EB (yellow arrows) seen within 12/12 brains.  
536 (P'') Single z plane from posterior region shown in (P) showing wide field neuron innervation  
537 within the EB seen within 9/12 brains.  
538 (Q) EB with innervation of two wedges, lacking the wide field innervation ( $n=1$ ).  
539 (R) EB with innervation of one wedge, lacking the wide field innervation ( $n=1$ ).



540 Abbreviations: PB (protocerebral bridge), FB (fan shaped body), EB (ellipsoid body), NO  
541 (noduli). Scale bar = 20 $\mu$ m.

542

543 **Supplemental Figure 1. Embryonic INP progeny contribute to the adult Lateral Accessory**  
544 **Lobe (LAL) and Gall neuropils.**

545 (A-F) Staining of central complex accessory regions in FLEX AMP positive control (A, D),  
546 negative control (B, E) and embryo-only (C, F) groups. The LAL and gall (white arrows in top  
547 panel) are strongly innervated in positive control (A), negative in control (B), and diffusely  
548 innervated in embryonic labeled brain (note strong density within gall, arrow) (C). An unknown  
549 region adjacent to ellipsoid body is densely innervated in the positive control (D), absent in  
550 negative control (E), and innervated sparsely in the embryonic-only brain (F). Note the  
551 commissural axons within the pattern in (F, yellow arrow). Scale bar = 20  $\mu$ m.

552

553 **References**

554

555 **Allan, D. W. and Thor, S.** (2015). Transcriptional selectors, masters, and  
556 combinatorial codes: regulatory principles of neural subtype specification. *Wiley*  
557 *Interdiscip Rev Dev Biol* **4**, 505-528.

558 **Alsio, J. M., Tarchini, B., Cayouette, M. and Livesey, F. J.** (2013). Ikaros promotes  
559 early-born neuronal fates in the cerebral cortex. *Proceedings of the National*  
560 *Academy of Sciences of the United States of America* **110**, E716-725.

561 **Baumgardt, M., Karlsson, D., Salmani, B. Y., Bivik, C., MacDonald, R. B., Gunnar,**  
562 **E. and Thor, S.** (2014). Global programmed switch in neural daughter cell  
563 proliferation mode triggered by a temporal gene cascade. *Dev Cell* **30**, 192-208.

564 **Bayraktar, O. A. and Doe, C. Q.** (2013). Combinatorial temporal patterning in  
565 progenitors expands neural diversity. *Nature* **498**, 445-455.

566 **Bayraktar, O. A., Boone, J. Q., Drummond, M. L. and Doe, C. Q.** (2010). Drosophila  
567 type II neuroblast lineages keep Prospero levels low to generate large clones that  
568 contribute to the adult brain central complex. *Neural Dev* **5**, 26.

569 **Bello, B. C., Izergina, N., Caussin, E. and Reichert, H.** (2008). Amplification of  
570 neural stem cell proliferation by intermediate progenitor cells in Drosophila brain  
571 development. *Neural Dev* **3**, 5.

572 **Bender, J. A., Pollack, A. J. and Ritzmann, R. E.** (2010). Neural activity in the  
573 central complex of the insect brain is linked to locomotor changes. *Curr Biol* **20**, 921-  
574 926.

575 **Benito-Sipos, J., Estacio-Gomez, A., Moris-Sanz, M., Baumgardt, M., Thor, S. and**  
576 **Diaz-Benjumea, F. J.** (2010). A genetic cascade involving klumpfuss, nab and castor  
577 specifies the abdominal leucokinergetic neurons in the Drosophila CNS. *Development*  
578 **137**, 3327-3336.

579 **Berger, C., Urban, J. and Technau, G. M.** (2001). Stage-specific inductive signals in  
580 the Drosophila neuroectoderm control the temporal sequence of neuroblast  
581 specification. *Development* **128**, 3243-3251.

582 **Bertet, C., Li, X., Erclik, T., Cavey, M., Wells, B. and Desplan, C.** (2014). Temporal  
583 patterning of neuroblasts controls Notch-mediated cell survival through regulation  
584 of Hid or Reaper. *Cell* **158**, 1173-1186.

585 **Boone, J. Q. and Doe, C. Q.** (2008). Identification of Drosophila type II neuroblast  
586 lineages containing transit amplifying ganglion mother cells. *Dev Neurobiol* **68**,  
587 1185-1195.

588 **Bowman, S. K., Rolland, V., Betschinger, J., Kinsey, K. A., Emery, G. and**  
589 **Knoblich, J. A.** (2008). The tumor suppressors Brat and Numb regulate transit-  
590 amplifying neuroblast lineages in Drosophila. *Dev Cell* **14**, 535-546.

591 **Boyan, G. S. and Reichert, H.** (2011). Mechanisms for complexity in the brain:  
592 generating the insect central complex. *Trends in neurosciences* **34**, 247-257.

593 **Brody, T. and Odenwald, W. F.** (2000). Programmed transformations in neuroblast  
594 gene expression during Drosophila CNS lineage development. *Dev Biol* **226**, 34-44.

595 **Brody, T. and Odenwald, W. F.** (2002). Cellular diversity in the developing nervous  
596 system: a temporal view from Drosophila. *Development* **129**, 3763-3770.

597 **Cenci, C. and Gould, A. P.** (2005). Drosophila Grainyhead specifies late programmes  
598 of neural proliferation by regulating the mitotic activity and Hox-dependent  
599 apoptosis of neuroblasts. *Development* **132**, 3835-3845.

600 **Chu-LaGraff, Q. and Doe, C. Q.** (1993). Neuroblast specification and formation  
601 regulated by wingless in the Drosophila CNS. *Science* **261**, 1594-1597.

602 **Cui, X. and Doe, C. Q.** (1992). ming is expressed in neuroblast sublineages and  
603 regulates gene expression in the Drosophila central nervous system. *Development*  
604 **116**, 943-952.

605 **Datta, S.** (1995). Control of proliferation activation in quiescent neuroblasts of the  
606 Drosophila central nervous system. *Development* **121**, 1173-1182.

607 **de Velasco, B., Erclik, T., Shy, D., Sclafani, J., Lipshitz, H., McInnes, R. and**  
608 **Hartenstein, V.** (2007). Specification and development of the pars intercerebralis  
609 and pars lateralis, neuroendocrine command centers in the Drosophila brain. *Dev*  
610 *Biol* **302**, 309-323.

611 **Doe, C. Q.** (2008). Neural stem cells: balancing self-renewal with differentiation.  
612 *Development* **135**, 1575-1587.

- 613 **Doe, C. Q.** (2017). Temporal Patterning in the Drosophila CNS. *Annu. Rev. Cell Dev.*  
614 *Biol.* **33**, in press.
- 615 **Egger, B., Chell, J. M. and Brand, A. H.** (2008). Insights into neural stem cell biology  
616 from flies. *Philos Trans R Soc Lond B Biol Sci* **363**, 39-56.
- 617 **Estacio-Gomez, A. and Diaz-Benjumea, F. J.** (2014). Roles of Hox genes in the  
618 patterning of the central nervous system of Drosophila. *Fly (Austin)* **8**, 26-32.
- 619 **Gabay, L., Scholz, H., Golembo, M., Klaes, A., Shilo, B. Z. and Klambt, C.** (1996).  
620 EGF receptor signaling induces pointed P1 transcription and inactivates Yan protein  
621 in the Drosophila embryonic ventral ectoderm. *Development* **122**, 3355-3362.
- 622 **Grosskortenhaus, R., Robinson, K. J. and Doe, C. Q.** (2006). Pdm and Castor  
623 specify late-born motor neuron identity in the NB7-1 lineage. *Genes Dev* **20**, 2618-  
624 2627.
- 625 **Herrero, P., Estacio-Gomez, A., Moris-Sanz, M., Alvarez-Rivero, J. and Diaz-**  
626 **Benjumea, F. J.** (2014). Origin and specification of the brain leucokinergic neurons  
627 of Drosophila: similarities to and differences from abdominal leucokinergic neurons.  
628 *Dev Dyn* **243**, 402-414.
- 629 **Hwang, H. J. and Rulifson, E.** (2011). Serial specification of diverse neuroblast  
630 identities from a neurogenic placode by Notch and Egfr signaling. *Development* **138**,  
631 2883-2893.
- 632 **Isshiki, T., Pearson, B., Holbrook, S. and Doe, C. Q.** (2001). Drosophila neuroblasts  
633 sequentially express transcription factors which specify the temporal identity of  
634 their neuronal progeny. *Cell* **106**, 511-521.
- 635 **Ito, M., Masuda, N., Shinomiya, K., Endo, K. and Ito, K.** (2013). Systematic analysis  
636 of neural projections reveals clonal composition of the Drosophila brain. *Curr Biol*  
637 **23**, 644-655.
- 638 **Izergina, N., Balmer, J., Bello, B. and Reichert, H.** (2009). Postembryonic  
639 development of transit amplifying neuroblast lineages in the Drosophila brain.  
640 *Neural Dev* **4**, 44.
- 641 **Kanai, M. I., Okabe, M. and Hiromi, Y.** (2005). seven-up Controls switching of  
642 transcription factors that specify temporal identities of Drosophila neuroblasts.  
643 *Developmental cell* **8**, 203-213.

- 644 **Kang, K. H. and Reichert, H.** (2015). Control of neural stem cell self-renewal and  
645 differentiation in *Drosophila*. *Cell Tissue Res* **359**, 33-45.
- 646 **Karcavich, R. and Doe, C. Q.** (2005). *Drosophila* neuroblast 7-3 cell lineage: a  
647 model system for studying programmed cell death, Notch/Numb signaling, and  
648 sequential specification of ganglion mother cell identity. *J Comp Neurol* **481**, 240-  
649 251.
- 650 **Kohwi, M. and Doe, C. Q.** (2013). Temporal fate specification and neural progenitor  
651 competence during development. *Nat Rev Neurosci* **14**, 823-838.
- 652 **Kohwi, M., Lupton, J. R., Lai, S. L., Miller, M. R. and Doe, C. Q.** (2013).  
653 Developmentally regulated subnuclear genome reorganization restricts neural  
654 progenitor competence in *Drosophila*. *Cell* **152**, 97-108.
- 655 **Kunz, T., Kraft, K. F., Technau, G. M. and Urbach, R.** (2012). Origin of *Drosophila*  
656 mushroom body neuroblasts and generation of divergent embryonic lineages.  
657 *Development* **139**, 2510-2522.
- 658 **Lacin, H. and Truman, J. W.** (2016). Lineage mapping identifies molecular and  
659 architectural similarities between the larval and adult *Drosophila* central nervous  
660 system. *Elife* **5**, e13399.
- 661 **Marin, E. C., Dry, K. E., Alaimo, D. R., Rudd, K. T., Cillo, A. R., Clenshaw, M. E.,  
662 Negre, N., White, K. P. and Truman, J. W.** (2012). Ultrabithorax confers spatial  
663 identity in a context-specific manner in the *Drosophila* postembryonic ventral  
664 nervous system. *Neural Dev* **7**, 31.
- 665 **Martin, J. R., Raabe, T. and Heisenberg, M.** (1999). Central complex substructures  
666 are required for the maintenance of locomotor activity in *Drosophila melanogaster*. *J*  
667 *Comp Physiol A* **185**, 277-288.
- 668 **Maurange, C. and Gould, A. P.** (2005). Brainy but not too brainy: starting and  
669 stopping neuroblast divisions in *Drosophila*. *Trends Neurosci* **28**, 30-36.
- 670 **Maurange, C., Cheng, L. and Gould, A. P.** (2008). Temporal transcription factors  
671 and their targets schedule the end of neural proliferation in *Drosophila*. *Cell* **133**,  
672 891-902.

- 673 **McDonald, J. A., Holbrook, S., Isshiki, T., Weiss, J., Doe, C. Q. and Mellerick, D. M.**  
674 (1998). Dorsoventral patterning in the Drosophila central nervous system: the vnd  
675 homeobox gene specifies ventral column identity. *Genes Dev* **12**, 3603-3612.
- 676 **Mettler, U., Vogler, G. and Urban, J.** (2006). Timing of identity: spatiotemporal  
677 regulation of hunchback in neuroblast lineages of Drosophila by Seven-up and  
678 Prospero. *Development* **133**, 429-437.
- 679 **Moris-Sanz, M., Estacio-Gomez, A., Alvarez-Rivero, J. and Diaz-Benjumea, F. J.**  
680 (2014). Specification of neuronal subtypes by different levels of Hunchback.  
681 *Development* **141**, 4366-4374.
- 682 **Moris-Sanz, M., Estacio-Gomez, A., Sanchez-Herrero, E. and Diaz-Benjumea, F. J.**  
683 (2015). The study of the Bithorax-complex genes in patterning CCAP neurons  
684 reveals a temporal control of neuronal differentiation by Abd-B. *Biol Open* **4**, 1132-  
685 1142.
- 686 **Nern, A., Pfeiffer, B. D. and Rubin, G. M.** (2015). Optimized tools for multicolor  
687 stochastic labeling reveal diverse stereotyped cell arrangements in the fly visual  
688 system. *Proc Natl Acad Sci U S A* **112**, E2967-2976.
- 689 **Novotny, T., Eiselt, R. and Urban, J.** (2002). Hunchback is required for the  
690 specification of the early sublineage of neuroblast 7-3 in the Drosophila central  
691 nervous system. *Development* **129**, 1027-1036.
- 692 **Ofstad, T. A., Zuker, C. S. and Reiser, M. B.** (2011). Visual place learning in  
693 *Drosophila melanogaster*. *Nature* **474**, 204-207.
- 694 **Pan, Y., Zhou, Y., Guo, C., Gong, H., Gong, Z. and Liu, L.** (2009). Differential roles of  
695 the fan-shaped body and the ellipsoid body in Drosophila visual pattern memory.  
696 *Learn Mem* **16**, 289-295.
- 697 **Poeck, B., Triphan, T., Neuser, K. and Strauss, R.** (2008). Locomotor control by  
698 the central complex in Drosophila-An analysis of the tay bridge mutant. *Dev*  
699 *Neurobiol* **68**, 1046-1058.
- 700 **Prokop, A. and Technau, G. M.** (1994). Early tagma-specific commitment of  
701 Drosophila CNS progenitor NB1-1. *Development* **120**, 2567-2578.
- 702 **Rebay, I.** (2002). Keeping the receptor tyrosine kinase signaling pathway in check:  
703 lessons from Drosophila. *Dev Biol* **251**, 1-17.

704 **Reichert, H.** (2011). Drosophila neural stem cells: cell cycle control of self-renewal,  
705 differentiation, and termination in brain development. *Results Probl Cell Differ* **53**,  
706 529-546.

707 **Renn, S. C., Armstrong, J. D., Yang, M., Wang, Z., An, X., Kaiser, K. and Taghert, P.**  
708 **H.** (1999). Genetic analysis of the Drosophila ellipsoid body neuropil: organization  
709 and development of the central complex. *J Neurobiol* **41**, 189-207.

710 **Riebli, N., Viktorin, G. and Reichert, H.** (2013). Early-born neurons in type II  
711 neuroblast lineages establish a larval primordium and integrate into adult circuitry  
712 during central complex development in Drosophila. *Neural Dev* **8**, 6.

713 **Seelig, J. D. and Jayaraman, V.** (2011). Studying sensorimotor processing with  
714 physiology in behaving Drosophila. *Int Rev Neurobiol* **99**, 169-189.

715 **Seelig, J. D. and Jayaraman, V.** (2013). Feature detection and orientation tuning in  
716 the Drosophila central complex. *Nature* **503**, 262-266.

717 **Seelig, J. D. and Jayaraman, V.** (2015). Neural dynamics for landmark orientation  
718 and angular path integration. *Nature* **521**, 186-191.

719 **Skeath, J. B. and Thor, S.** (2003). Genetic control of Drosophila nerve cord  
720 development. *Curr Opin Neurobiol* **13**, 8-15.

721 **Skeath, J. B., Zhang, Y., Holmgren, R., Carroll, S. B. and Doe, C. Q.** (1995).  
722 Specification of neuroblast identity in the Drosophila embryonic central nervous  
723 system by gooseberry-distal. *Nature* **376**, 427-430.

724 **Sousa-Nunes, R., Cheng, L. Y. and Gould, A. P.** (2010). Regulating neural  
725 proliferation in the Drosophila CNS. *Curr Opin Neurobiol* **20**, 50-57.

726 **Strauss, R.** (2002). The central complex and the genetic dissection of locomotor  
727 behaviour. *Curr Opin Neurobiol* **12**, 633-638.

728 **Tran, K. D. and Doe, C. Q.** (2008). Pdm and Castor close successive temporal  
729 identity windows in the NB3-1 lineage. *Development* **135**, 3491-3499.

730 **Truman, J. W. and Bate, M.** (1988). Spatial and temporal patterns of neurogenesis  
731 in the central nervous system of Drosophila melanogaster. *Dev Biol* **125**, 145-157.

732 **Tsuji, T., Hasegawa, E. and Isshiki, T.** (2008). Neuroblast entry into quiescence is  
733 regulated intrinsically by the combined action of spatial Hox proteins and temporal  
734 identity factors. *Development* **135**, 3859-3869.



- 735 **Ulvklo, C., MacDonald, R., Bivik, C., Baumgardt, M., Karlsson, D. and Thor, S.**  
736 (2012). Control of neuronal cell fate and number by integration of distinct daughter  
737 cell proliferation modes with temporal progression. *Development* **139**, 678-689.
- 738 **Urbach, R. and Technau, G. M.** (2003). Early steps in building the insect brain:  
739 neuroblast formation and segmental patterning in the developing brain of different  
740 insect species. *Arthropod Struct Dev* **32**, 103-123.
- 741 **Urban, J. and Mettler, U.** (2006). Connecting temporal identity to mitosis: the  
742 regulation of Hunchback in *Drosophila* neuroblast lineages. *Cell Cycle* **5**, 950-952.
- 743 **Wang, Z., Pan, Y., Li, W., Jiang, H., Chazimanolis, L., Chang, J., Gong, Z. and Liu, L.**  
744 (2008). Visual pattern memory requires foraging function in the central complex of  
745 *Drosophila*. *Learn Mem* **15**, 133-142.
- 746 **Weiss, J. B., Von Ohlen, T., Mellerick, D. M., Dressler, G., Doe, C. Q. and Scott, M.**  
747 **P.** (1998). Dorsoventral patterning in the *Drosophila* central nervous system: the  
748 intermediate neuroblasts defective homeobox gene specifies intermediate column  
749 identity. *Genes Dev* **12**, 3591-3602.
- 750 **Wessnitzer, J. and Webb, B.** (2006). Multimodal sensory integration in insects--  
751 towards insect brain control architectures. *Bioinspir Biomim* **1**, 63-75.
- 752 **Wolff, T., Iyer, N. A. and Rubin, G. M.** (2015). Neuroarchitecture and  
753 neuroanatomy of the *Drosophila* central complex: A GAL4-based dissection of  
754 protocerebral bridge neurons and circuits. *J Comp Neurol* **523**, 997-1037.
- 755 **Xie, Y., Li, X., Deng, X., Hou, Y., O'Hara, K., Urso, A., Peng, Y., Chen, L. and Zhu, S.**  
756 (2016). The Ets protein pointed prevents both premature differentiation and  
757 dedifferentiation of *Drosophila* intermediate neural progenitors. *Development*.
- 758 **Yu, H. H., Awasaki, T., Schroeder, M. D., Long, F., Yang, J. S., He, Y., Ding, P., Kao,**  
759 **J. C., Wu, G. Y., Peng, H. et al.** (2013). Clonal development and organization of the  
760 adult *Drosophila* central brain. *Curr Biol* **23**, 633-643.
- 761 **Zhu, S., Barshow, S., Wildonger, J., Jan, L. Y. and Jan, Y. N.** (2011). Ets  
762 transcription factor Pointed promotes the generation of intermediate neural  
763 progenitors in *Drosophila* larval brains. *Proceedings of the National Academy of*  
764 *Sciences of the United States of America* **108**, 20615-20620.
- 765

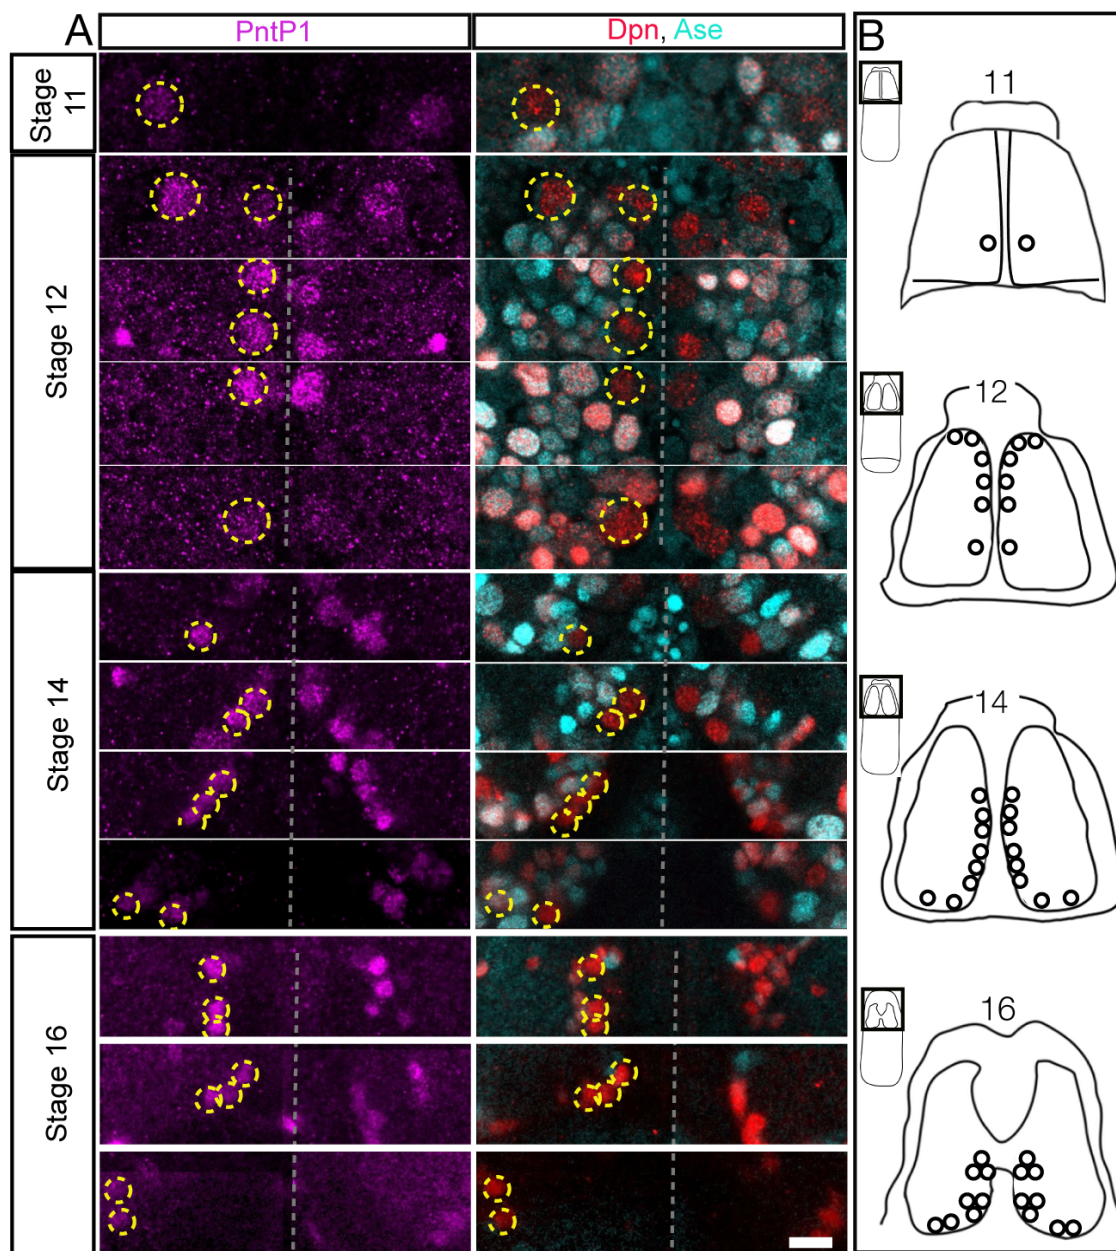

Figure 1, Walsh & Doe

766

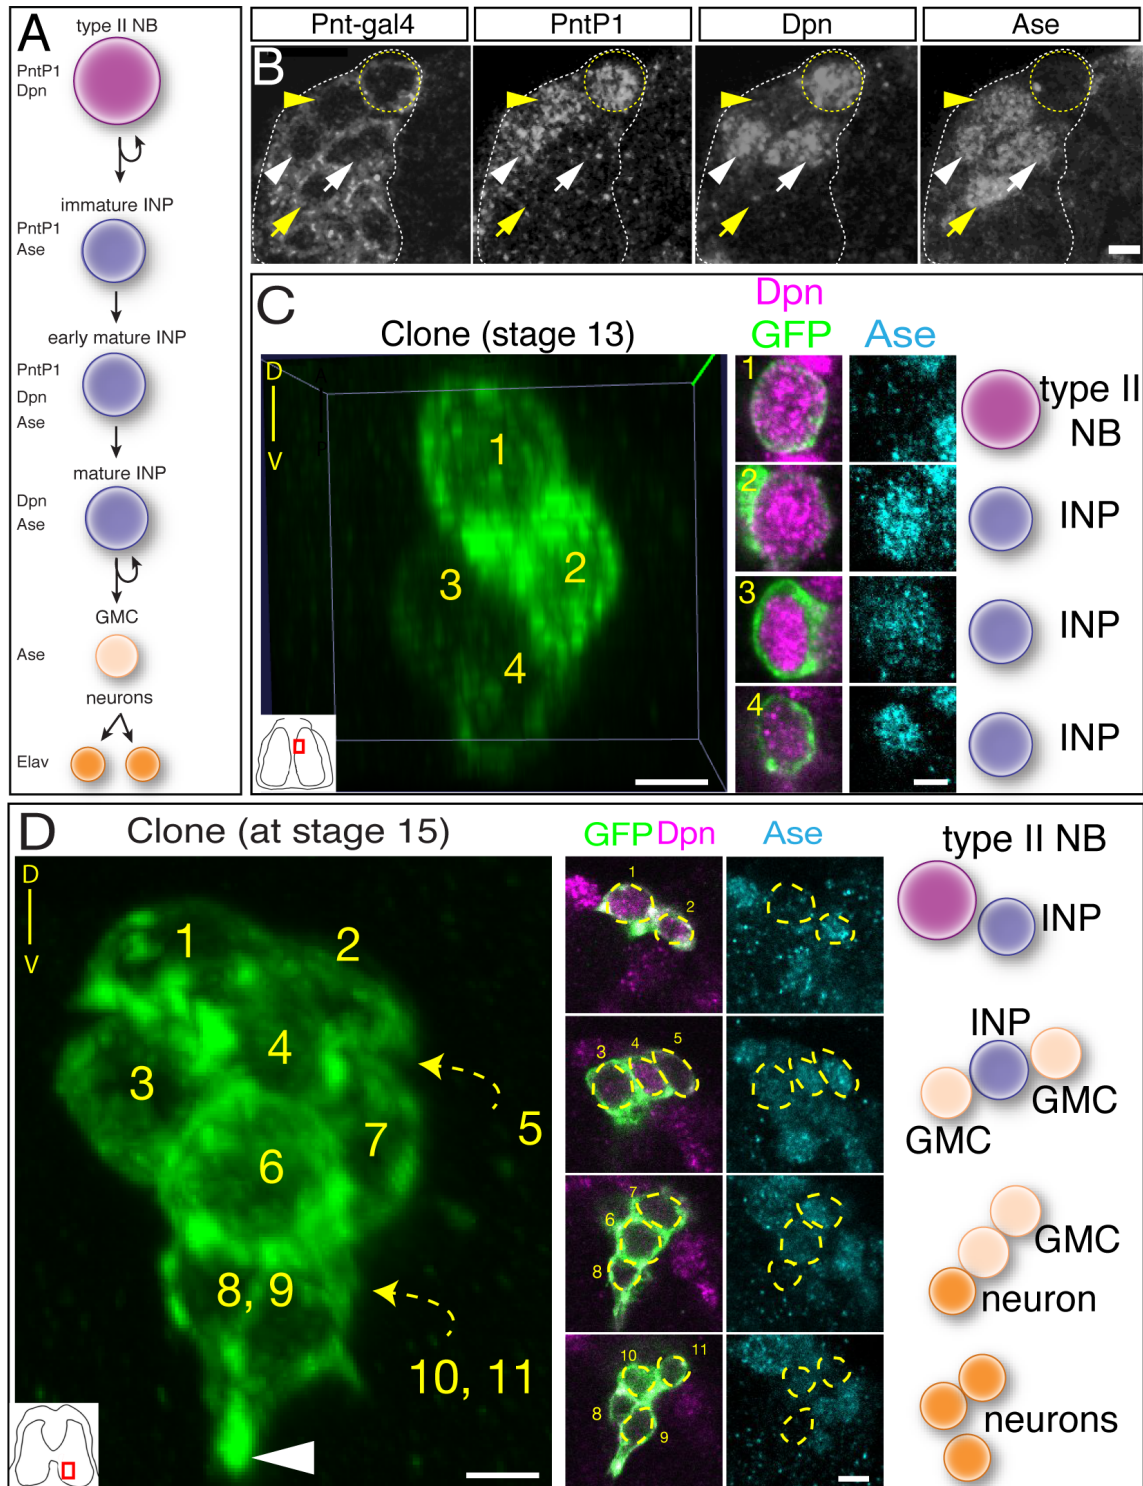

767

Figure 2, Walsh and Doe



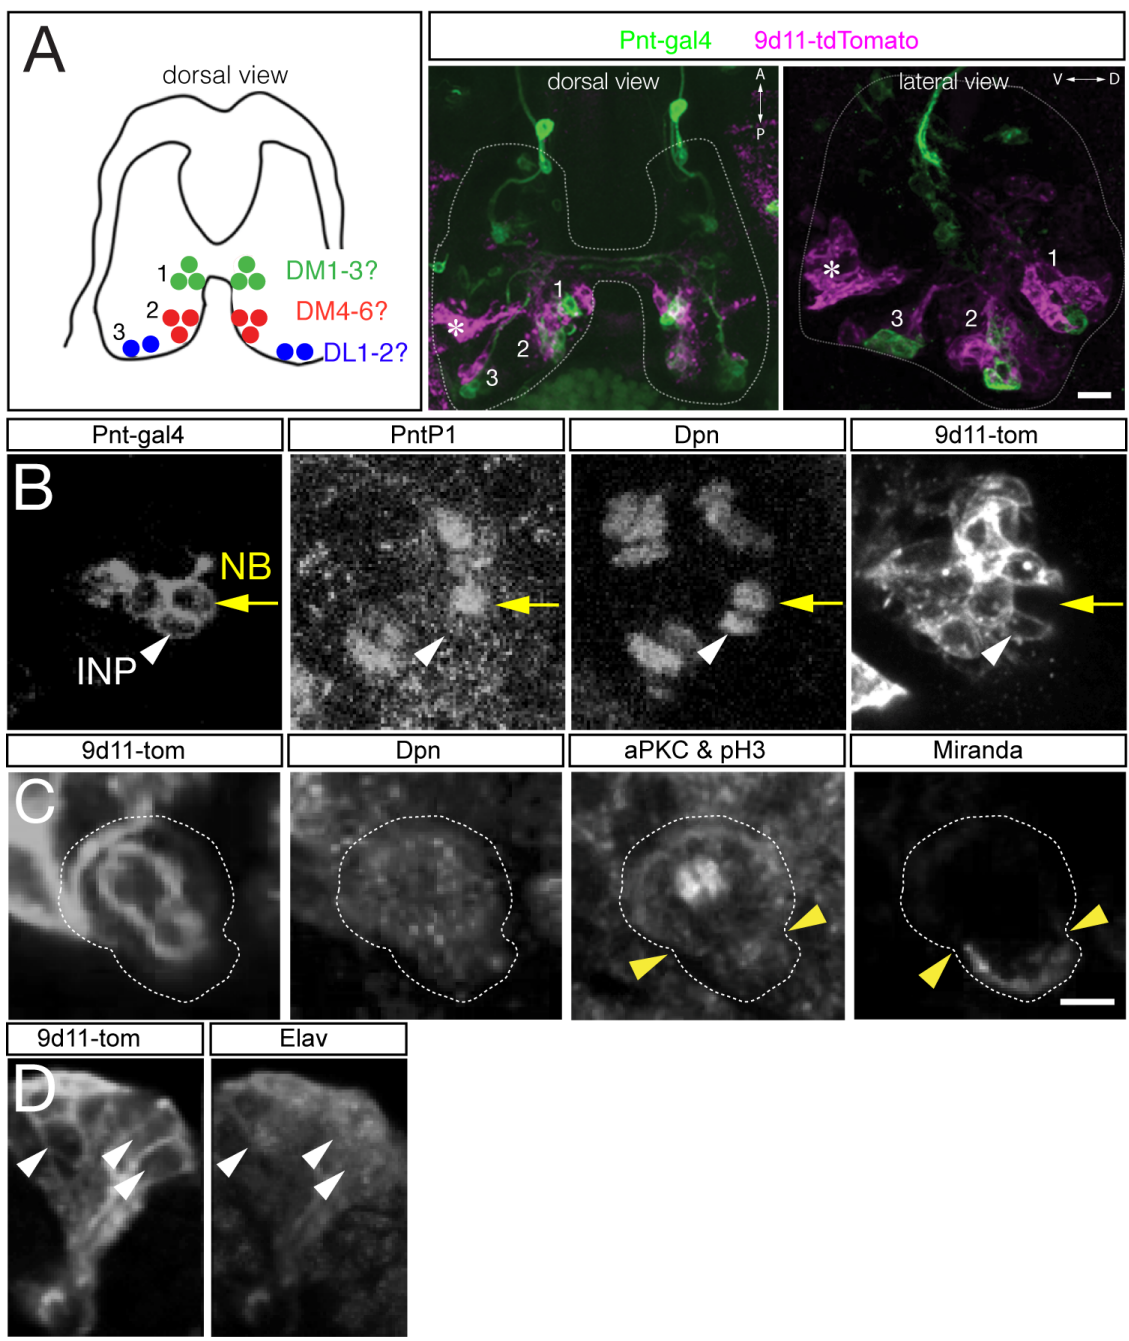

768 Figure 3, Walsh & Doe

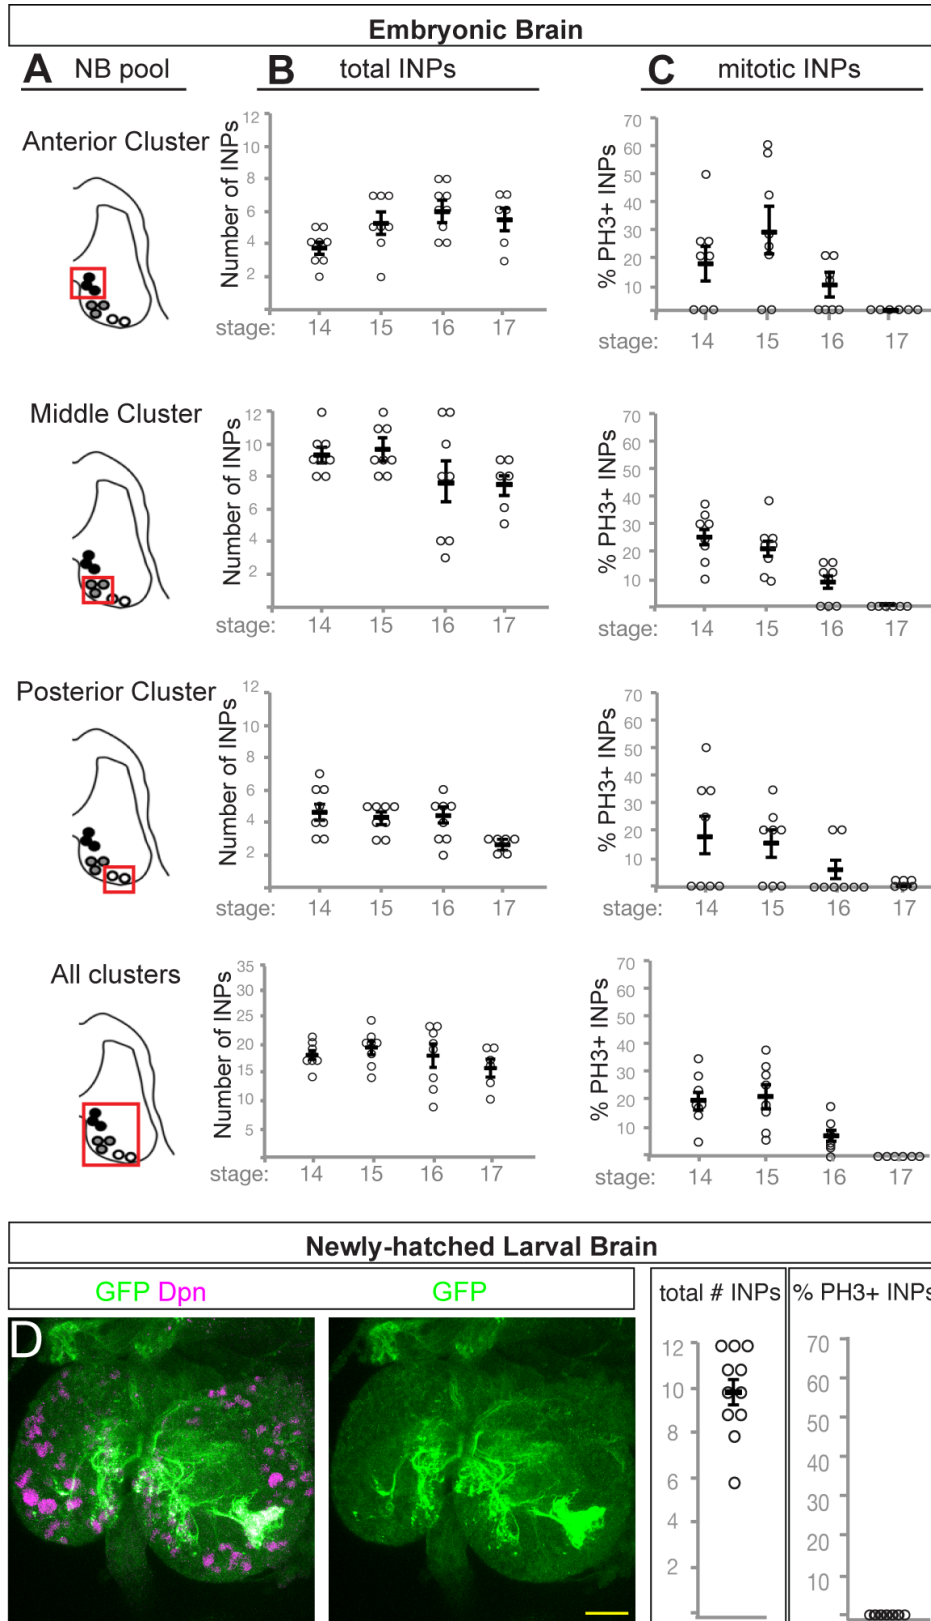

769

Figure 4, Walsh & Doe

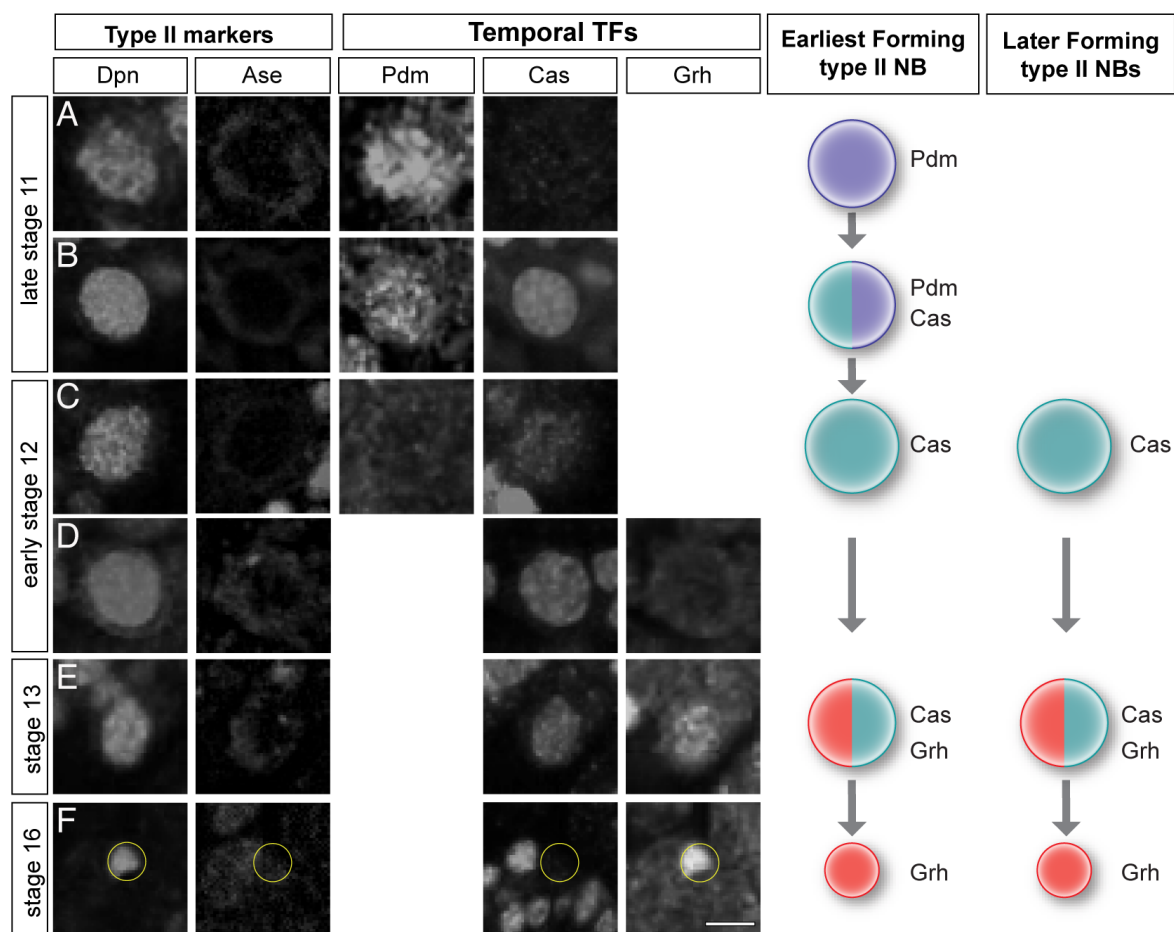

Figure 5, Walsh & Doe

770  
771

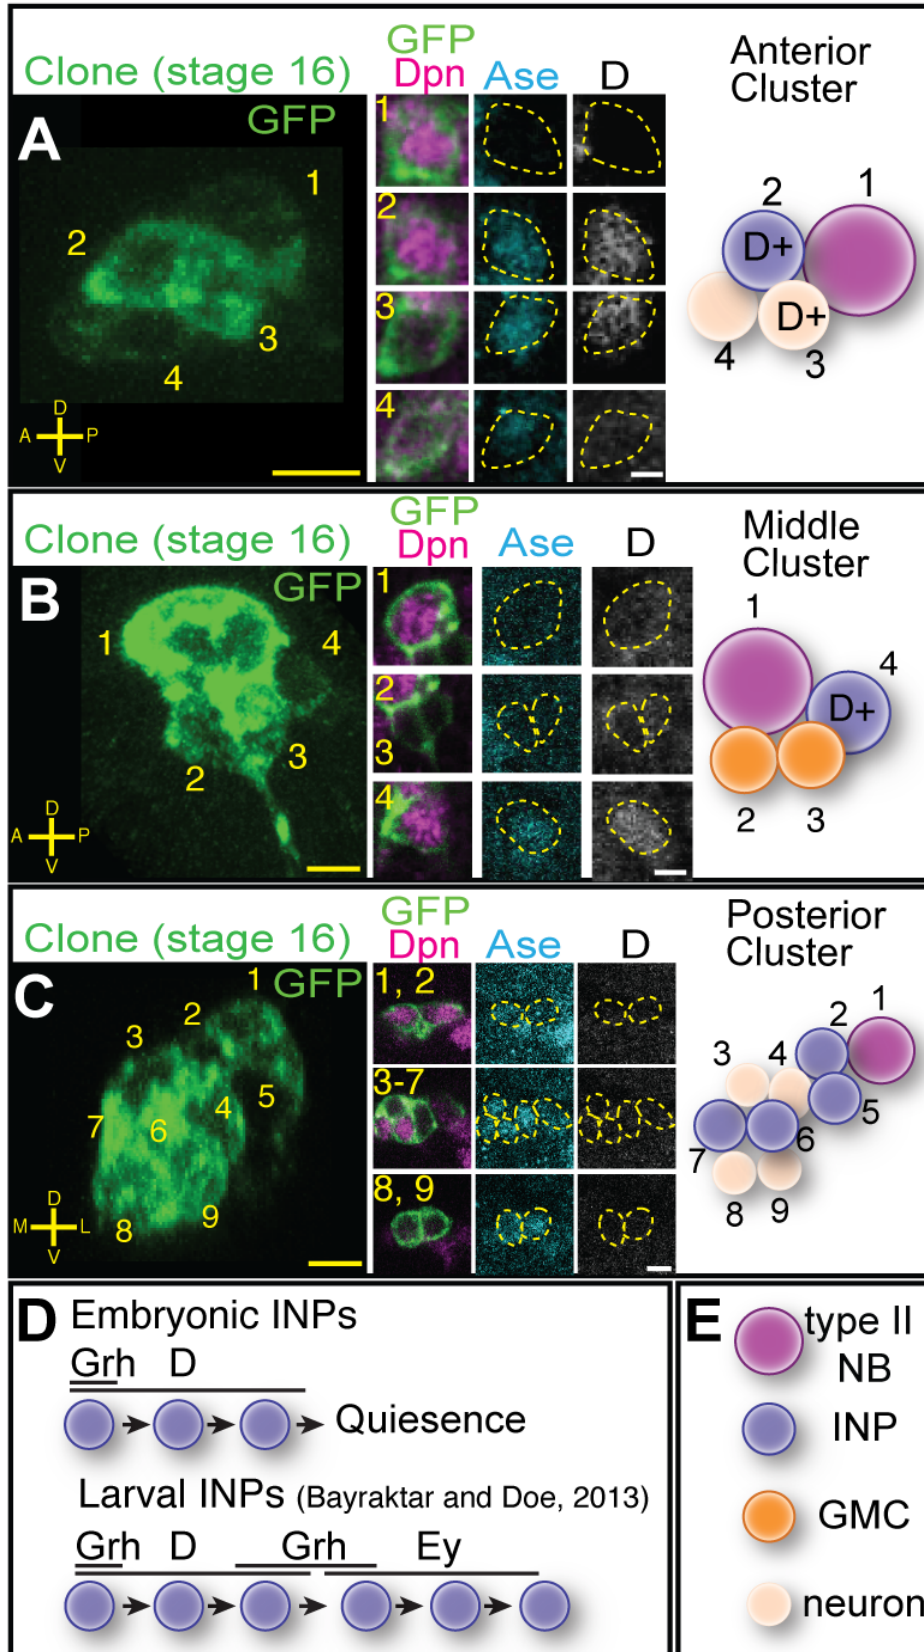

Figure 6, Walsh & Doe



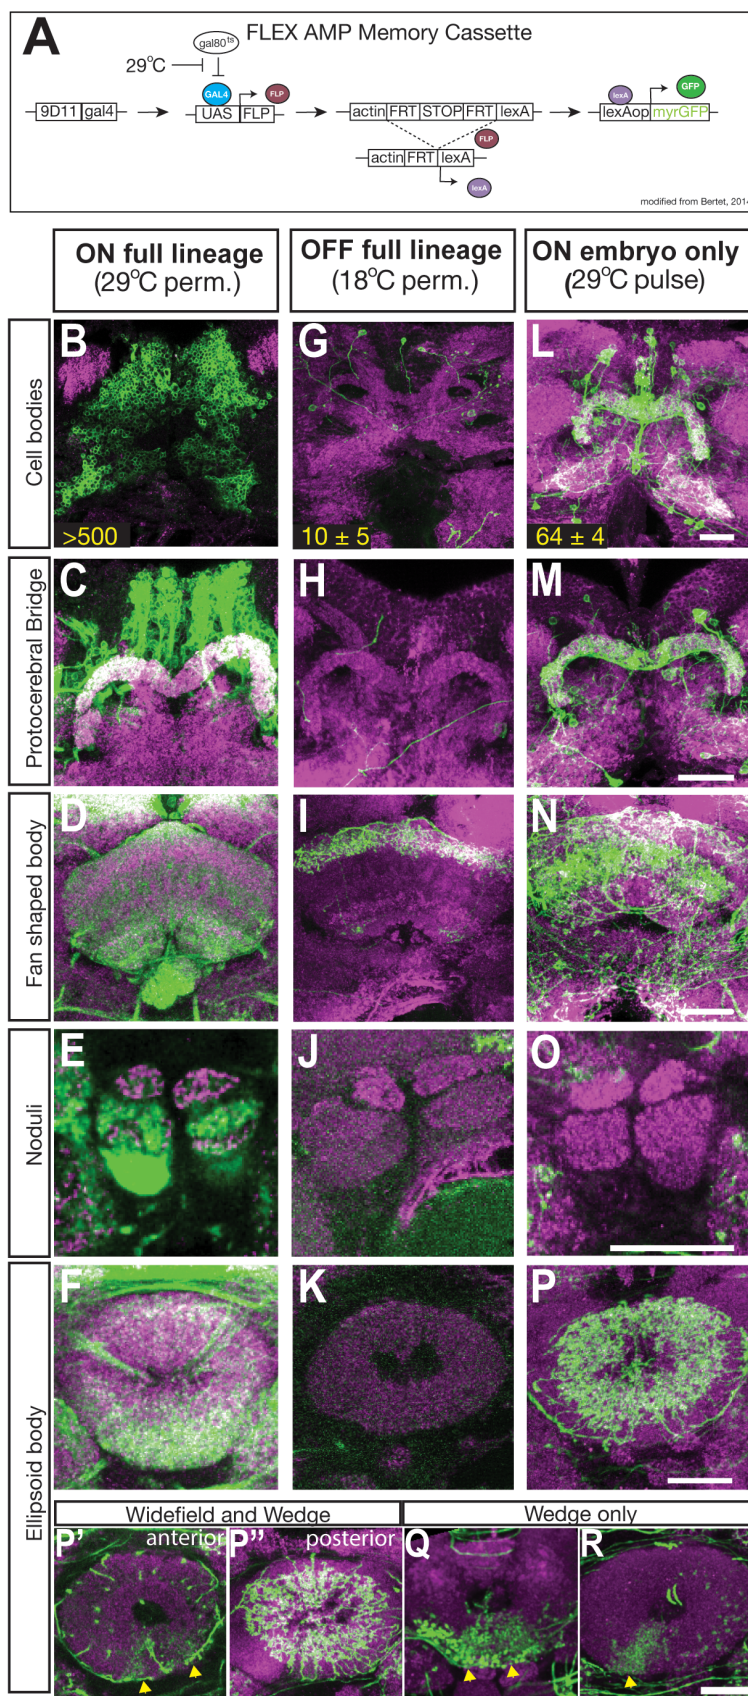

773

Figure 7, Walsh & Doe

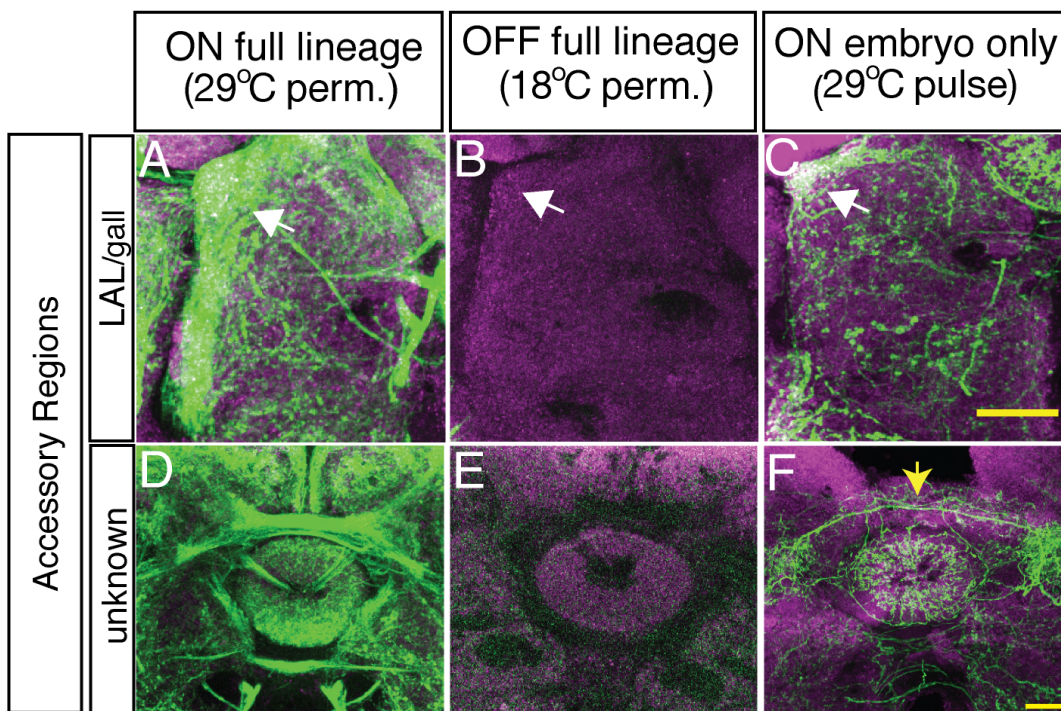

Supplementary Figure 1, Walsh & Doe

774  
775  
776  
777  
778  
779  
780  
781  
782  
783  
784
